# Supplementary material for: A qualitative cancer screening study with childhood sexual abuse survivors: experiences, perspectives and compassionate care
Source: HighWire-hosted journal article supplement (doi:10.1136/bmjopen-2015-007628), 2015-08-01
Supplement: bmjopen-2015-007628supp_appendices.pdf [file bmjopen-2015-007628supp_appendices.pdf]

## **Appendix I: Interview Guide**

### **PART I: Informed Consent for Interviews**

#### **What's this Project About?**

The purpose of this project is to increase cancer screening among individuals who have a history of sexual abuse. To do this, we need to understand what would improve cancer screening among individuals who have been sexually abused. We will use what we learn to develop and pilot an educational video targeting health care providers from the medical community on the needs of abuse survivors in relation to cancer screening.

#### **Why Me?**

We would like to talk with you because you are an abuse survivor.

#### **What do you want from me?**

We would like your guidance and insight on what would make it easier to get screened for breast, cervical and/or colon cancer. Phone interviews will run 45 minutes to a little over an hour if we get chatty.

#### **What are the Risks?**

The interview will focus on present experiences with the medical system and cancer screening. However, the conversation could touch on past memories of abuse, which could bring up old feelings, which may or may not be distressing. You will be supported through all emotions experienced through conversation and interaction. If you feel

sadness or sorrow, we will ask you how you want to proceed (e.g. sit quietly while they work through the emotion, take a break, continue, or finish up early). **If you feel you need additional support, we will cover the cost of a session with your therapist.** You may also refuse to participate or withdraw from this project at any time. You will still be compensated. We will retain any information you have given to us up to that point. No knowledge or information you share with us will be associated with your identity. Results from all interviews will be aggregated so no one, other than the interviewer, will know what you communicated.

### **What are the Benefits?**

The direct benefits are having your voice heard, increasing the awareness and understanding of abuse in relation to cancer screening, having an influence on cancer screening programs, practice, and policy in Ontario. Sometimes participating in studies also gives one the opportunity to learn from others and clarify our own knowing and thinking, especially as we talk about things. The community will also benefit from your knowledge, which will lead to improved cancer screening.

### **Do you have any questions?**

|                                       |            |           |
|---------------------------------------|------------|-----------|
| <b>Would you like to participate?</b> | <b>Yes</b> | <b>No</b> |
|---------------------------------------|------------|-----------|

## **PART II: INTERVIEW QUESTIONS**

### **Guide/Process:**

First, visit to ease into conversation and develop communication style.

Second, introduce study and review consent form.

Third, ask questions.

Throughout the interview, feel free to:

- Empower participant through the value of their participation,
- Use personal sharing (as helpful) to build rapport and trust,
- Provide support and validation to help participant through emotions that arise during interview,
- Pay attention throughout to how participant is feeling
- Check in at end to make sure participant is ok and supported

### **Questions:**

1. What is seeing a doctor, nurse or lab tech like for you?
  - If respondents say it's hard, express understanding. "Yes, that's hard for a lot of people who've been sexually abused. What do you think that doctors

and nurses need to know?"

2. Have you gone for cancer screening?

- Ask about each of breast, cervical and colon cancer as appropriate.
- If yes, what helps you go? What could be improved?
- If no, what stops you from going? What would help you? What could be improved?

3. Is there's anything else that doctors or lab techs could do to make it easier?

- If the person says, "oh I can't imagine anything it's so hard", then say, "what makes it hard/for you?"
- In the study so far, sexual abuse has been brought up as a barrier to screening for breast, cervical and colon cancer à most personal sites for screening à what would help abuse survivors get screened
- Do you think a self-collected HPV test would be helpful if it was available?

4. Is there anything else you want to say or we should know?

Thank you for your time and insights. They are greatly appreciated.

**APPENDIX II: Consolidated criteria for reporting qualitative studies (COREQ): 32-item checklist**

| No                                   | Item                     | Guide questions/description                                    | Details                                                         |
|--------------------------------------|--------------------------|----------------------------------------------------------------|-----------------------------------------------------------------|
| <b>Domain 1:</b>                     |                          |                                                                |                                                                 |
| <b>Research team and reflexivity</b> |                          |                                                                |                                                                 |
|                                      | Personal Characteristics | Which author/s conducted the interview or focus group?         | LN<br>DG – PhD; LN – Hon BA, Survivor, Educator,                |
| 1.                                   | Interviewer/facilitator  | What were the researcher's credentials?<br><i>E.g. PhD, MD</i> | International Author and Advocate, Moderator of Survivors' Chat |
| 2.                                   | Credentials              |                                                                | DG – associate professor; LN – researcher, writer               |
| 3.                                   | Occupation               | What was their occupation at the time of the study?            |                                                                 |

| No                             | Item                                     | Guide questions/description                                                                                     | Details                                                                 |
|--------------------------------|------------------------------------------|-----------------------------------------------------------------------------------------------------------------|-------------------------------------------------------------------------|
| 4.                             | Gender                                   | Was the researcher male or female?                                                                              | Female<br><br>Both researchers                                          |
| 5.                             | Experience and training                  | What experience or training did the researcher have?                                                            | have experience conducting interviews on sensitive sexual health topics |
| Relationship with participants |                                          |                                                                                                                 |                                                                         |
| 6.                             | Relationship established                 | Was a relationship established prior to study commencement?                                                     | LN knew several participants prior to the study                         |
| 7.                             | Participant knowledge of the interviewer | What did the participants know about the researcher? e.g. <i>personal goals, reasons for doing the research</i> | Purpose of the study was reviewed during the consent process            |
| 8.                             | Interviewer characteristics              | What characteristics were reported about the interviewer/facilitator? e.g.                                      | LN is a Survivor                                                        |

| No                  | Item                                  | Guide questions/description                                                               | Details                |
|---------------------|---------------------------------------|-------------------------------------------------------------------------------------------|------------------------|
|                     |                                       | <i>Bias, assumptions, reasons and interests in the research topic</i>                     |                        |
| <b>Domain 2:</b>    |                                       |                                                                                           |                        |
| <b>study design</b> |                                       |                                                                                           |                        |
|                     | Theoretical framework                 |                                                                                           |                        |
|                     |                                       | What methodological orientation was stated to underpin the study? e.g.                    | Thematic analysis      |
| 9.                  | Methodological orientation and Theory | <i>grounded theory, discourse analysis, ethnography, phenomenology, content analysis</i>  |                        |
|                     | Participant selection                 |                                                                                           |                        |
| 10.                 | Sampling                              | How were participants selected? e.g. <i>purposive, convenience, consecutive, snowball</i> | Purposive and snowball |

| No      | Item                         | Guide questions/description                                                              | Details                                                                                 |
|---------|------------------------------|------------------------------------------------------------------------------------------|-----------------------------------------------------------------------------------------|
| 11.     | Method of approach           | How were participants approached? e.g. <i>face-to-face, telephone, mail, email</i>       | Email, messaging in survivors' boards, word-of-mouth, participant referral              |
| 12.     | Sample size                  | How many participants were in the study?                                                 | 12                                                                                      |
| 13.     | Non-participation            | How many people refused to participate or dropped out? Reasons?                          | None                                                                                    |
| Setting |                              |                                                                                          |                                                                                         |
| 14.     | Setting of data collection   | Where was the data collected? e.g. <i>home, clinic, workplace</i>                        | On-line and over the phone                                                              |
| 15.     | Presence of non-participants | Was anyone else present besides the participants and researchers?                        | No                                                                                      |
| 16.     | Description of sample        | What are the important characteristics of the sample? e.g. <i>demographic data, date</i> | All participants were female Survivors in a stable situation and ranged in age (40's to |



| No              | Item                   | Guide questions/description                                                   | Details                                                      |
|-----------------|------------------------|-------------------------------------------------------------------------------|--------------------------------------------------------------|
| Data collection |                        |                                                                               | 70's), education, geographic location                        |
|                 |                        | Were questions, prompts, guides provided by the authors? Was it pilot tested? | See methods                                                  |
| 17.             | Interview guide        |                                                                               | No, however, every participant was                           |
| 18.             | Repeat interviews      | Were repeat interviews carried out? If yes, how many?                         | contacted one week after their interview for member checking |
| 19.             | Audio/visual recording | Did the research use audio or visual recording to collect the data?           | See methods                                                  |
| 20.             | Field notes            | Were field notes made during and/or after the interview or focus group?       | Yes                                                          |
| 21.             | Duration               | What was the duration of the interviews or focus                              | Approximately one hour each                                  |

| No                           | Item                           | Guide questions/description                                 | Details                  |
|------------------------------|--------------------------------|-------------------------------------------------------------|--------------------------|
|                              |                                | group?                                                      |                          |
| 22.                          | Data saturation                | Was data saturation discussed?                              | Yes                      |
|                              |                                | Were transcripts returned                                   | See methods              |
| 23.                          | Transcripts returned           | to participants for comment and/or correction?              |                          |
| <b>Domain 3:</b>             |                                |                                                             |                          |
| <b>analysis and findings</b> |                                |                                                             |                          |
| Data analysis                |                                |                                                             |                          |
| 24.                          | Number of data coders          | How many data coders coded the data?                        | Two                      |
| 25.                          | Description of the coding tree | Did authors provide a description of the coding tree?       | See Results              |
| 26.                          | Derivation of themes           | Were themes identified in advance or derived from the data? | Themes derived from data |
| 27.                          | Software                       | What software, if applicable, was used to                   | No software was used     |

| No        | Item                         | Guide questions/description                                                                                                              | Details          |
|-----------|------------------------------|------------------------------------------------------------------------------------------------------------------------------------------|------------------|
|           |                              | manage the data?                                                                                                                         |                  |
| 28.       | Participant checking         | Did participants provide feedback on the findings?                                                                                       | Yes              |
| Reporting |                              |                                                                                                                                          |                  |
|           |                              | Were participant quotations presented to illustrate the themes / findings? Was each quotation identified? e.g. <i>participant number</i> | Yes              |
| 29.       | Quotations presented         |                                                                                                                                          |                  |
|           |                              | Was there consistency between the data presented and the findings?                                                                       | Yes              |
| 30.       | Data and findings consistent |                                                                                                                                          |                  |
| 31.       | Clarity of major themes      | Were major themes clearly presented in the findings?                                                                                     | Yes, see Results |
|           |                              | Is there a description of diverse cases or discussion of minor themes?                                                                   | Yes, see Results |
| 32.       | Clarity of minor themes      |                                                                                                                                          |                  |
